# Supplementary material
Source: PubMed Central journal article supplement (PMC4188416)
Supplement: NIHMS618131-supplement-Supple__Figs_.pdf [file NIHMS618131-supplement-Supple__Figs_.pdf]

## Lodato, Arlotta; Supplementary Figure 1

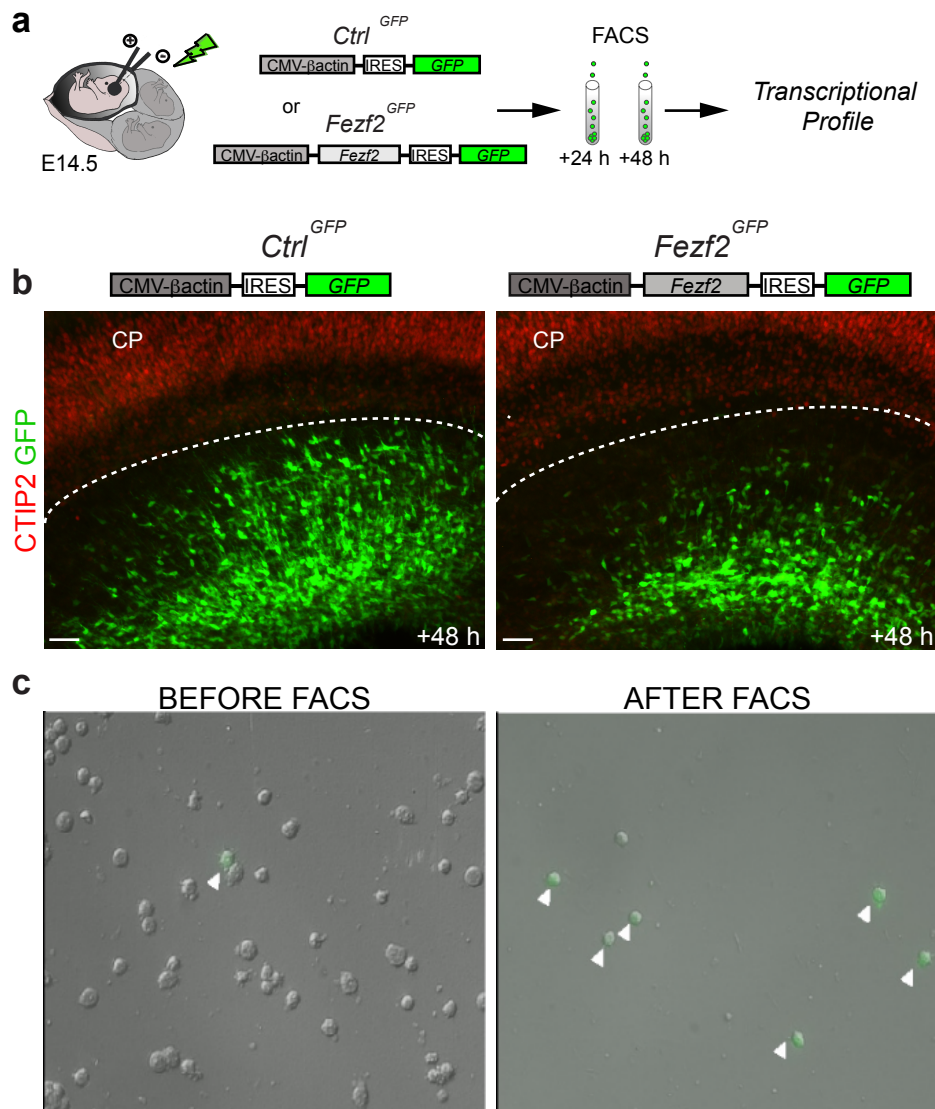

**Supplementary Figure 1. FACS-purification of cortical progenitors electroporated *in vivo* with *Fezf2*<sup>GFP</sup> and *Ctrl*<sup>GFP</sup> expression constructs at E14.5.**

**(a)** Schematic of the experimental approach. **(b)** Coronal sections of *Ctrl*<sup>GFP</sup> and *Fezf2*<sup>GFP</sup>-electroporated brains, 48 hours after electroporation, showing GFP-positive progenitors within the proliferative zones. CTIP2 immunohistochemistry (red) marks corticofugal neurons in the developing cortical plate. **(c)** Dissociated cortical cells before and after FACS purification; only a very small percentage of dissociated cells are electroporated (GFP-positive). FACS purification of GFP-positive cells results in virtually pure populations of labeled cells. CP, cortical plate. Scale bars, 100μm (b).

Lodato, Arlotta; Supplementary Figure 2

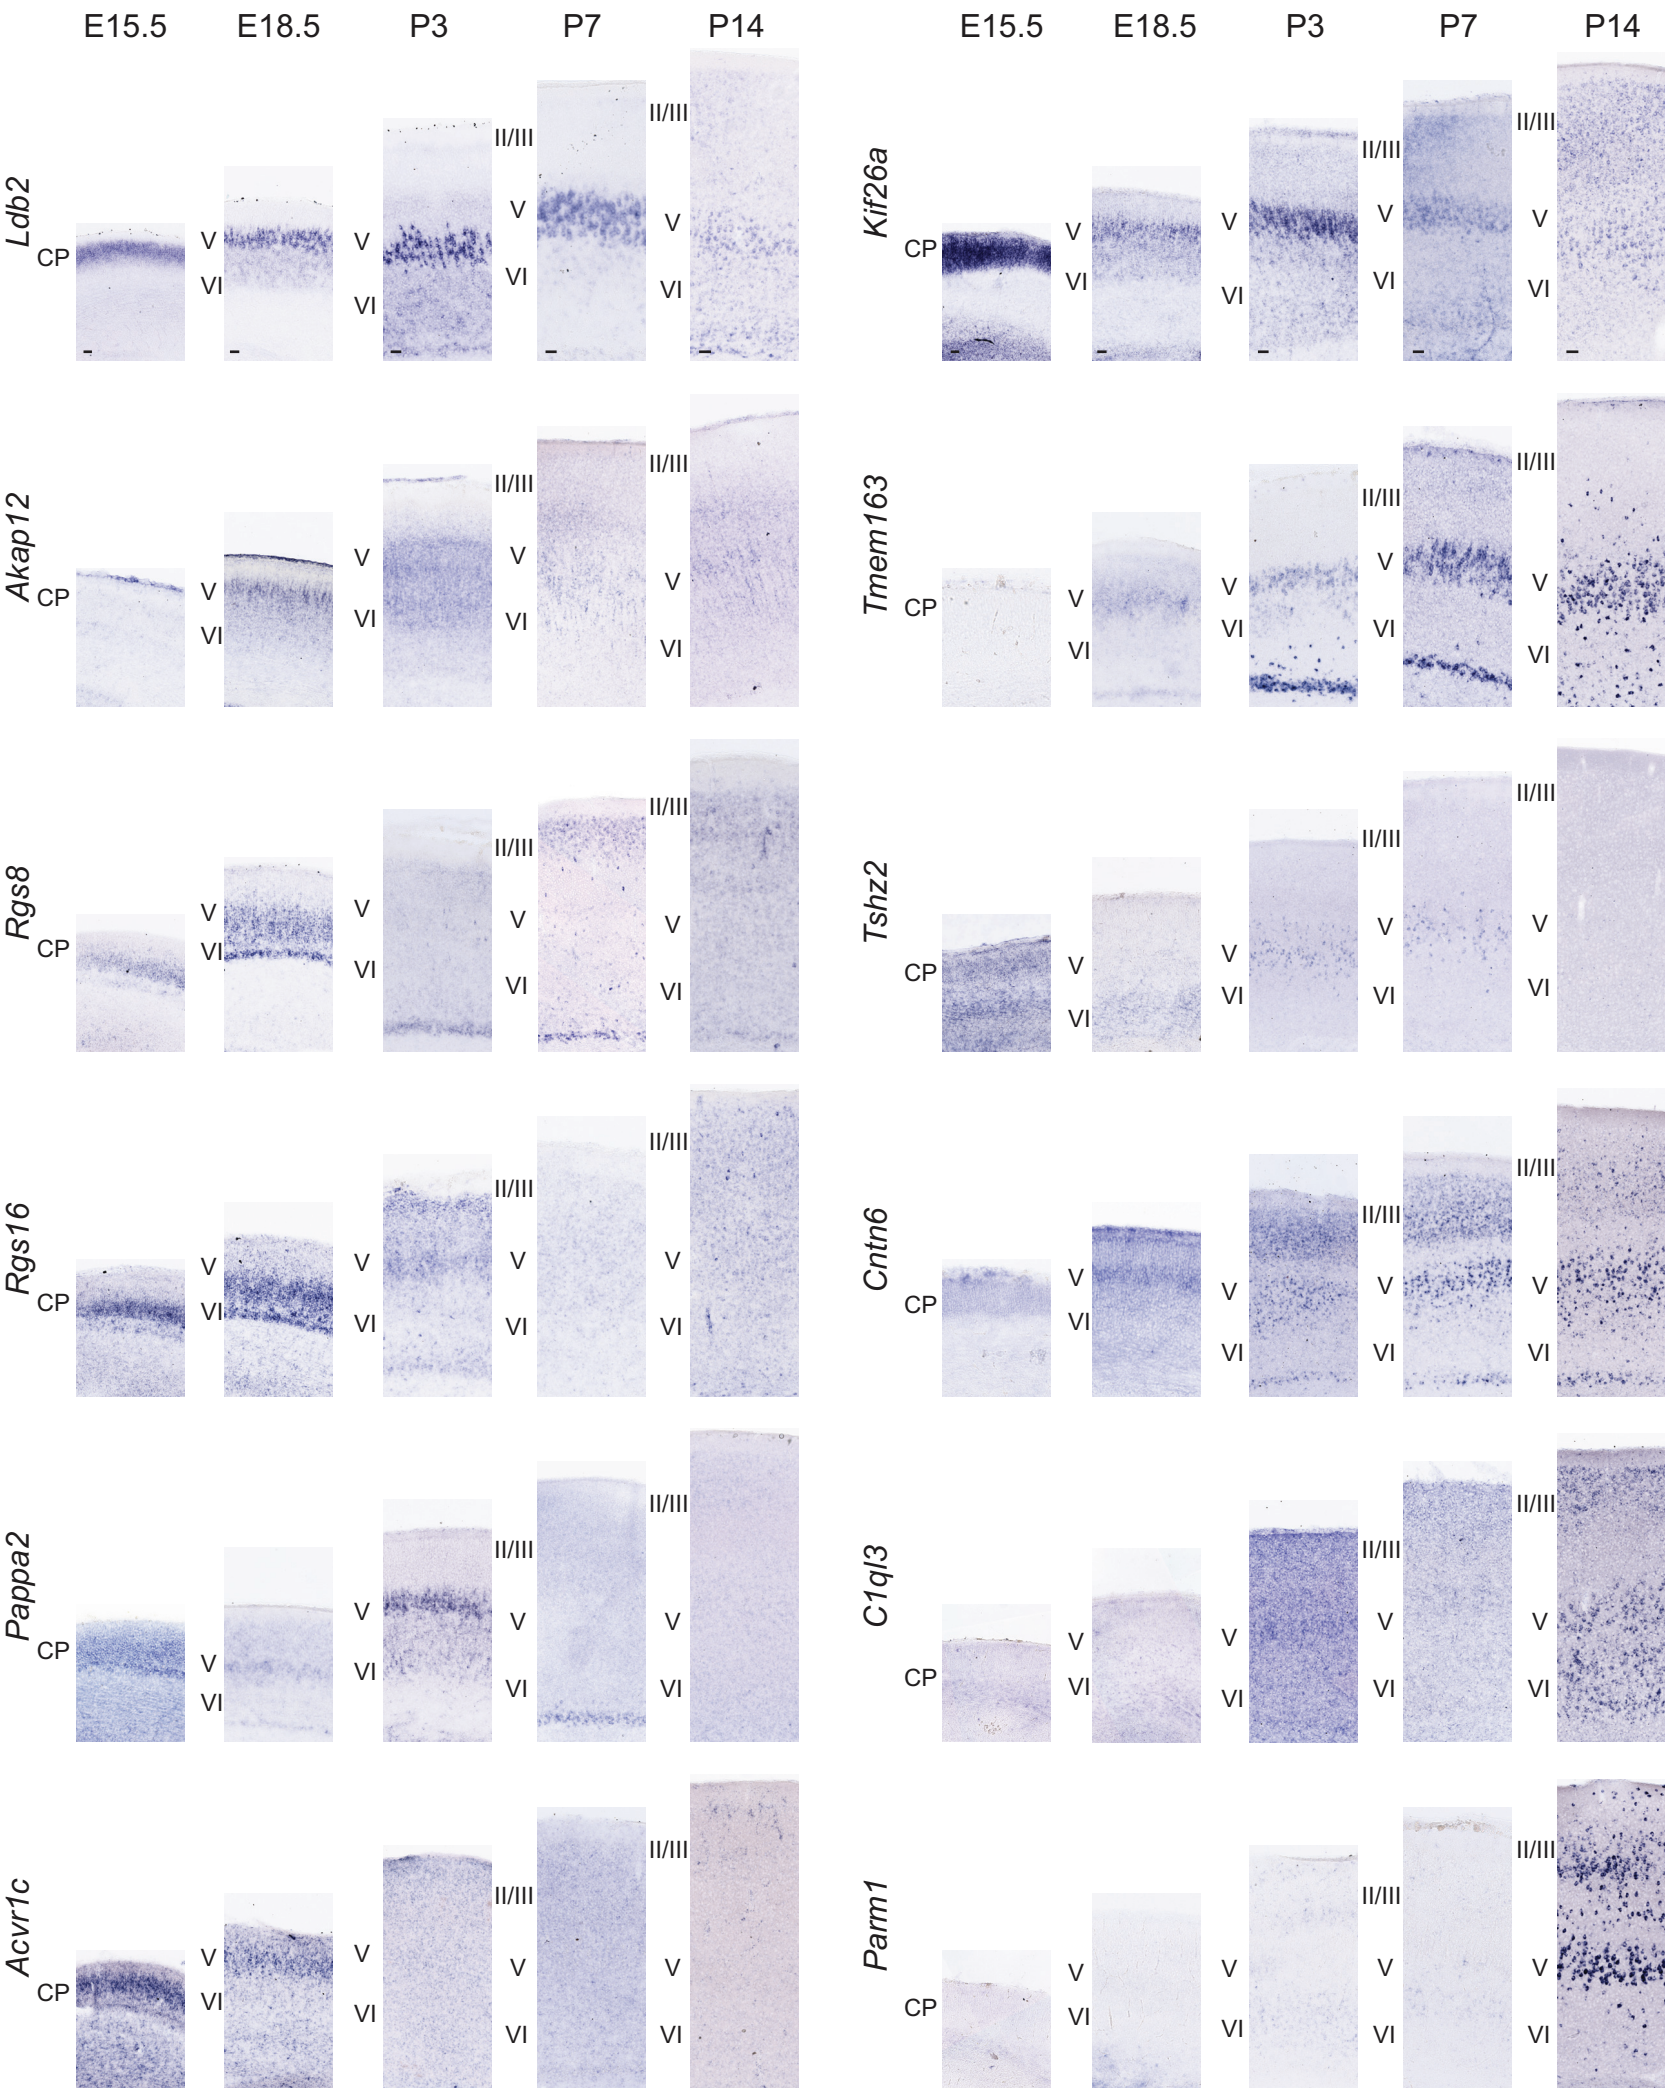

**Supplementary Figure 2. Expression profiles of *Fezf2*-induced genes at multiple embryonic and postnatal stages.**

Expression profiles of 12 genes up-regulated by *Fezf2* (shown in **Figure 1**) were examined by *in situ* hybridization in wild type cortices of E15.5, E18.5, P3, P7 and P14 wild type mice. CP, cortical plate. Scale bars, 50  $\mu$ m.

(Related to Figure 1).

Lodato, Arlotta; Supplementary Figure 3

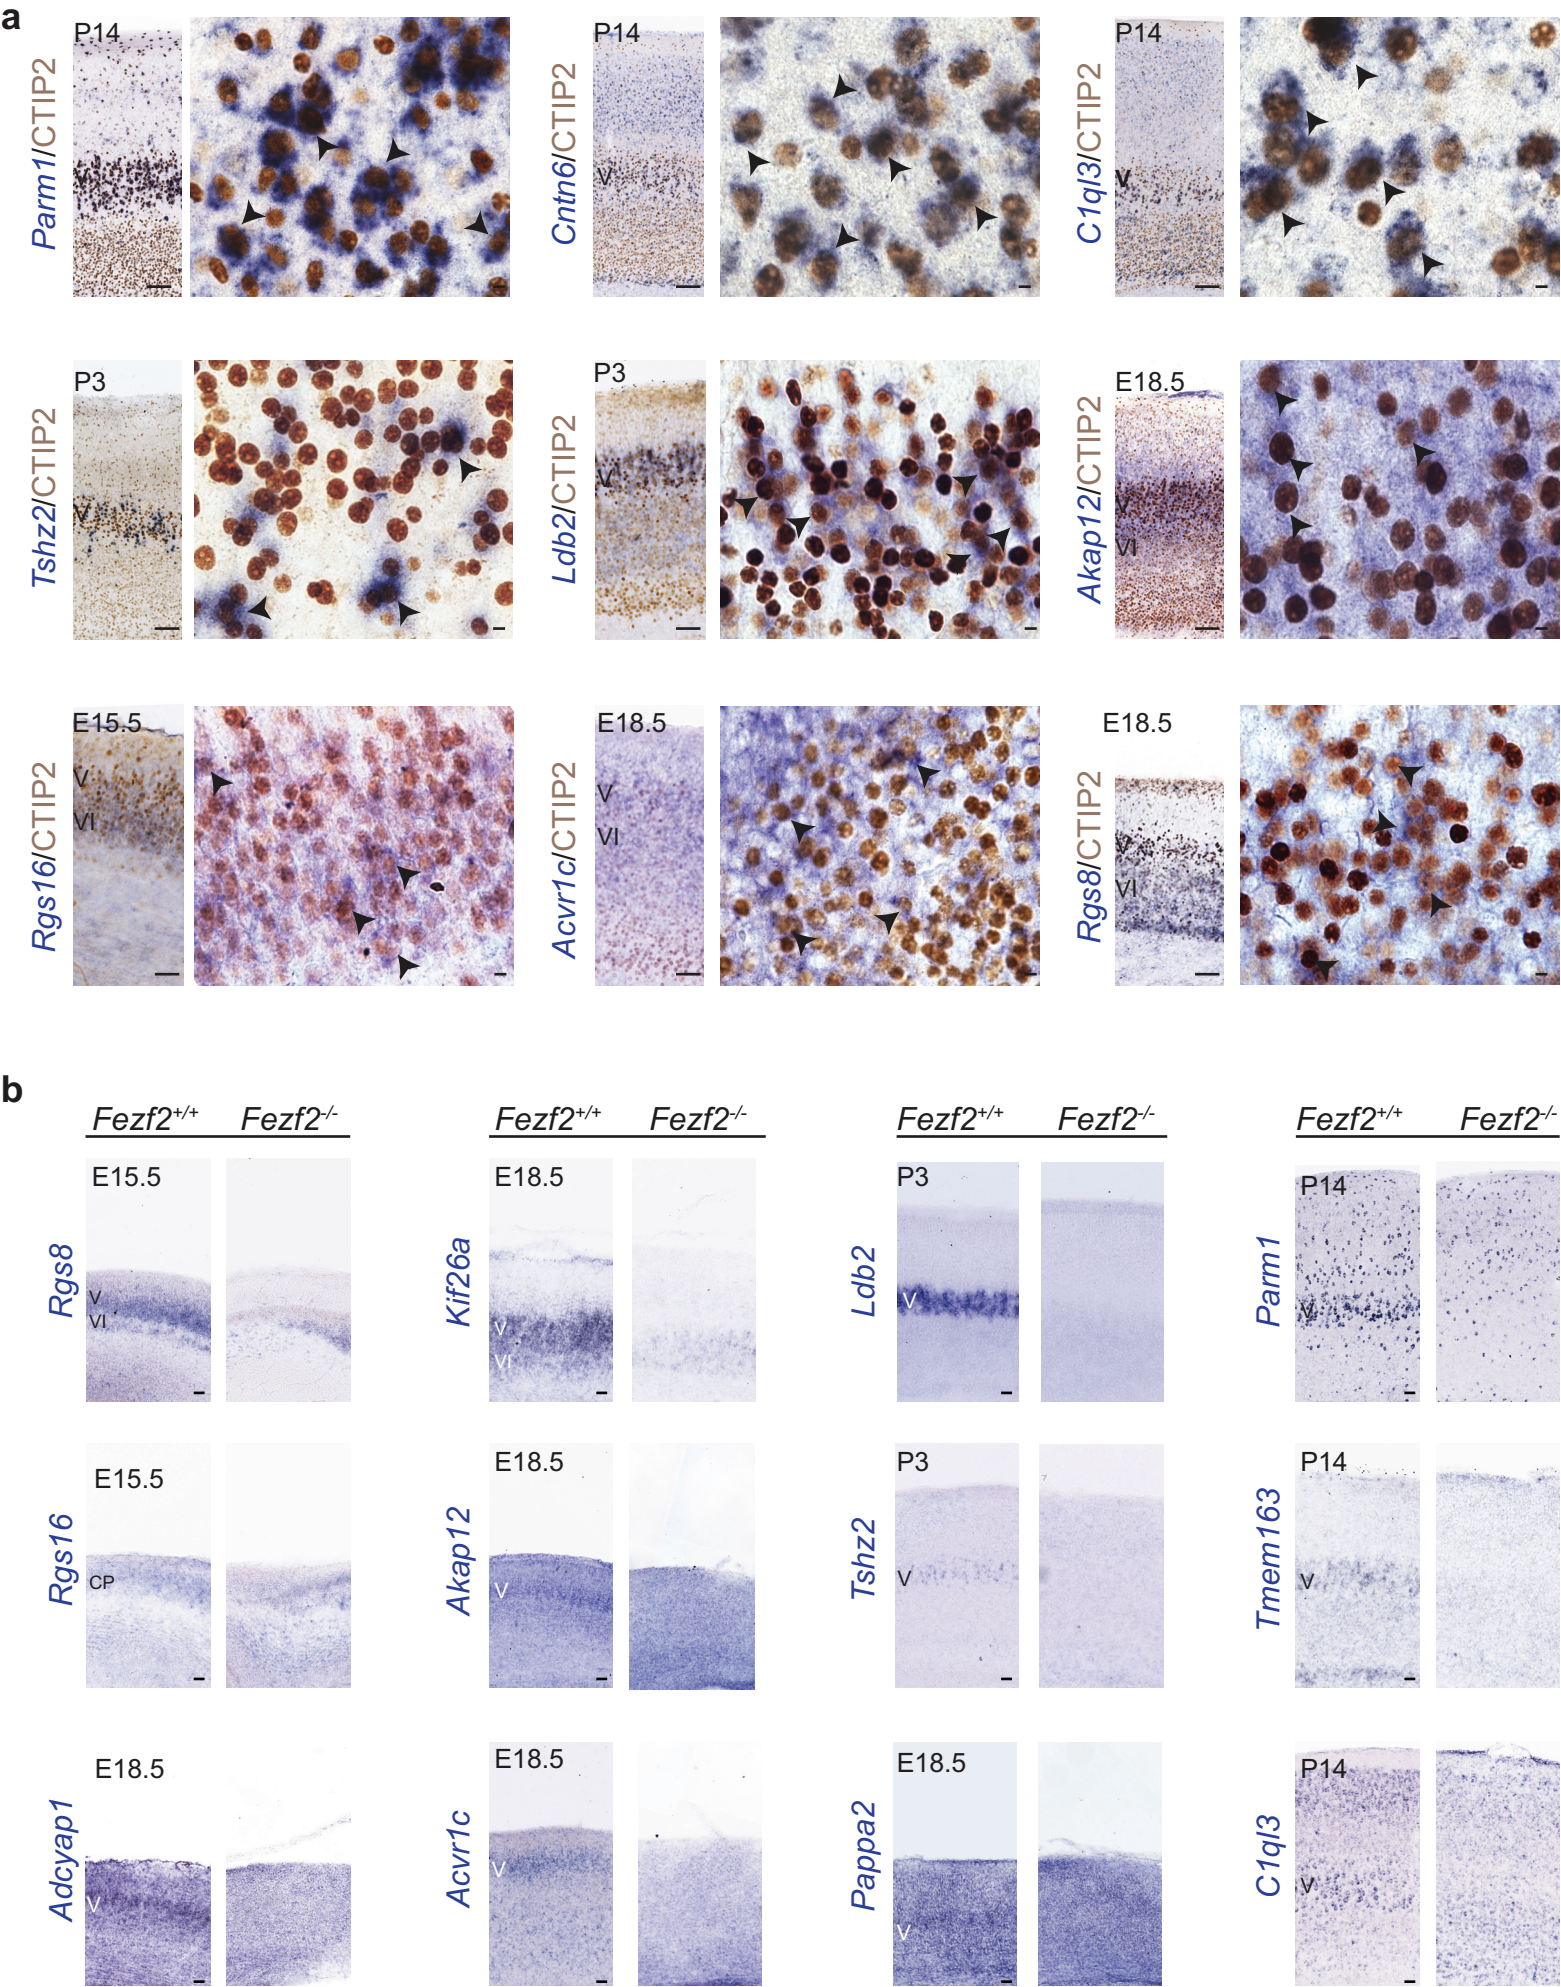

**Supplementary Figure 3. Expression of *Fezf2* target genes in Layer Vb subcerebral projection neurons is dependent on *Fezf2* expression.**

**(a)** *In situ* hybridizations for selected *Fezf2*-induced genes (blue signal) followed by immunocytochemistry for CTIP2 (brown signal) were performed on coronal sections of wild type mouse brains. **(b)** *In situ* hybridizations of selected *Fezf2*-induced genes on coronal sections of *Fezf*<sup>-/-</sup> brains (right) and wild type littermate controls (left). CP, cortical plate. Scale bars, 50  $\mu$ m **(a)** left panels and **(b)**, and 20  $\mu$ m **(a)** right panels.

(Related to Figure 2).

Lodato, Arlotta; Supplementary Figure 4

**a** Expression profile of Fezf2-induced genes in the developing neocortex at E14.5

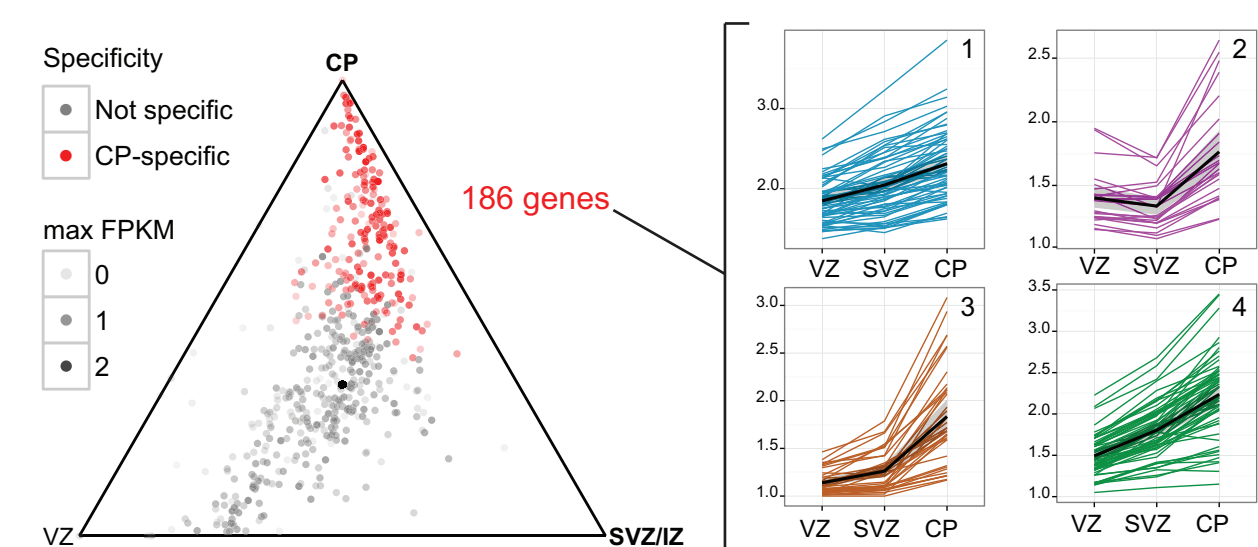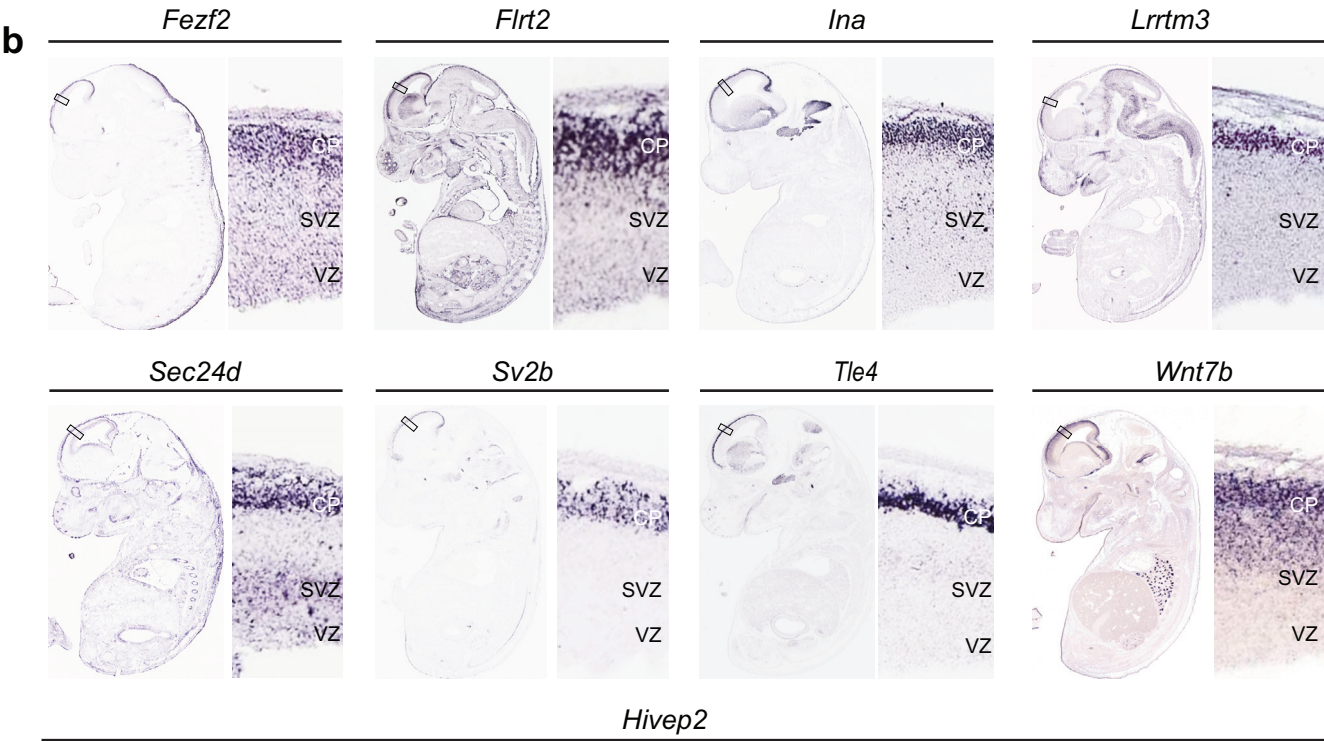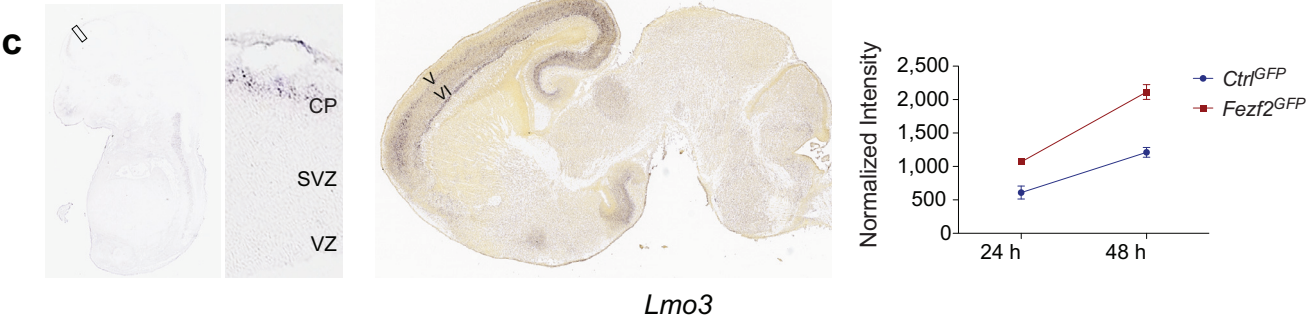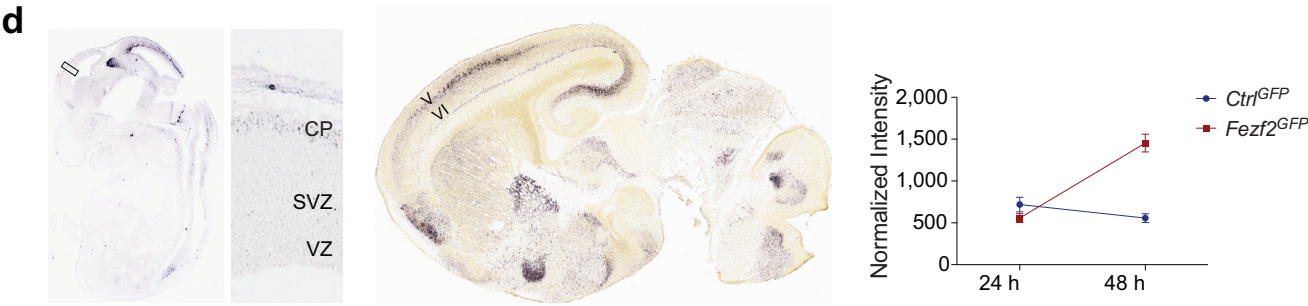

**Supplementary Figure 4. *Fezf2*-induced genes are expressed in nascent CSMN.**

**(a)** Left, ternary plot of gene expression probabilities in VZ, SVZ/IZ and CP for *Fezf2*-induced targets shows enrichment in the cortical plate. Right, cluster representation of 186 genes induced by *Fezf2* and also significantly enriched in the E14.5 CP. Y axis, FPKM (Fragments Per Kilobase RNA per Million mapped reads). Complete gene list is available in **Supplementary Table 2**. **(b)** Upper most left panel) *In situ* hybridization for *Fezf2* on an E14.5 embryo shows the position of the cortical plate (CP). *In situ* hybridizations ([www.genepaint.org](http://www.genepaint.org)) for prototypical genes induced by *Fezf2* and enriched in the E14.5 CP (insets, enlarged from boxed areas). **(c-d)** *In situ* hybridizations for *Hivep2* and *Lmo3* at E14.5 (left panels) and at P4 (middle panels, [www.developingmouse.brain-map.org](http://www.developingmouse.brain-map.org)) show specific expression in the developing CP and in layer V CSMN, confirming that *Fezf2* induces expression of CSMN genes from early stages of development. Right panels, expression levels of *Hivep2* **(c)** and *Lmo3* **(d)** in *Ctrl*<sup>GFP</sup> (blue line) and *Fezf2*<sup>GFP</sup> samples (red line) at 24 hours and 48 hours. Error bars indicate standard errors of the mean (SEM). CP, cortical plate; SVZ, subventricular zone; VZ, ventricular zone; IZ intermediate zone. Images shown in **b**; **c** and **d** left 2 panels are from the Genepaint database and **c** and **d** middle panels are from the Allen Brain Atlas database.

(Related to Figure 2).

Lodato,Arlotta; Supplementary Figure 5

Expression profile of Fezf2-repressed genes in the developing neocortex at E14.5

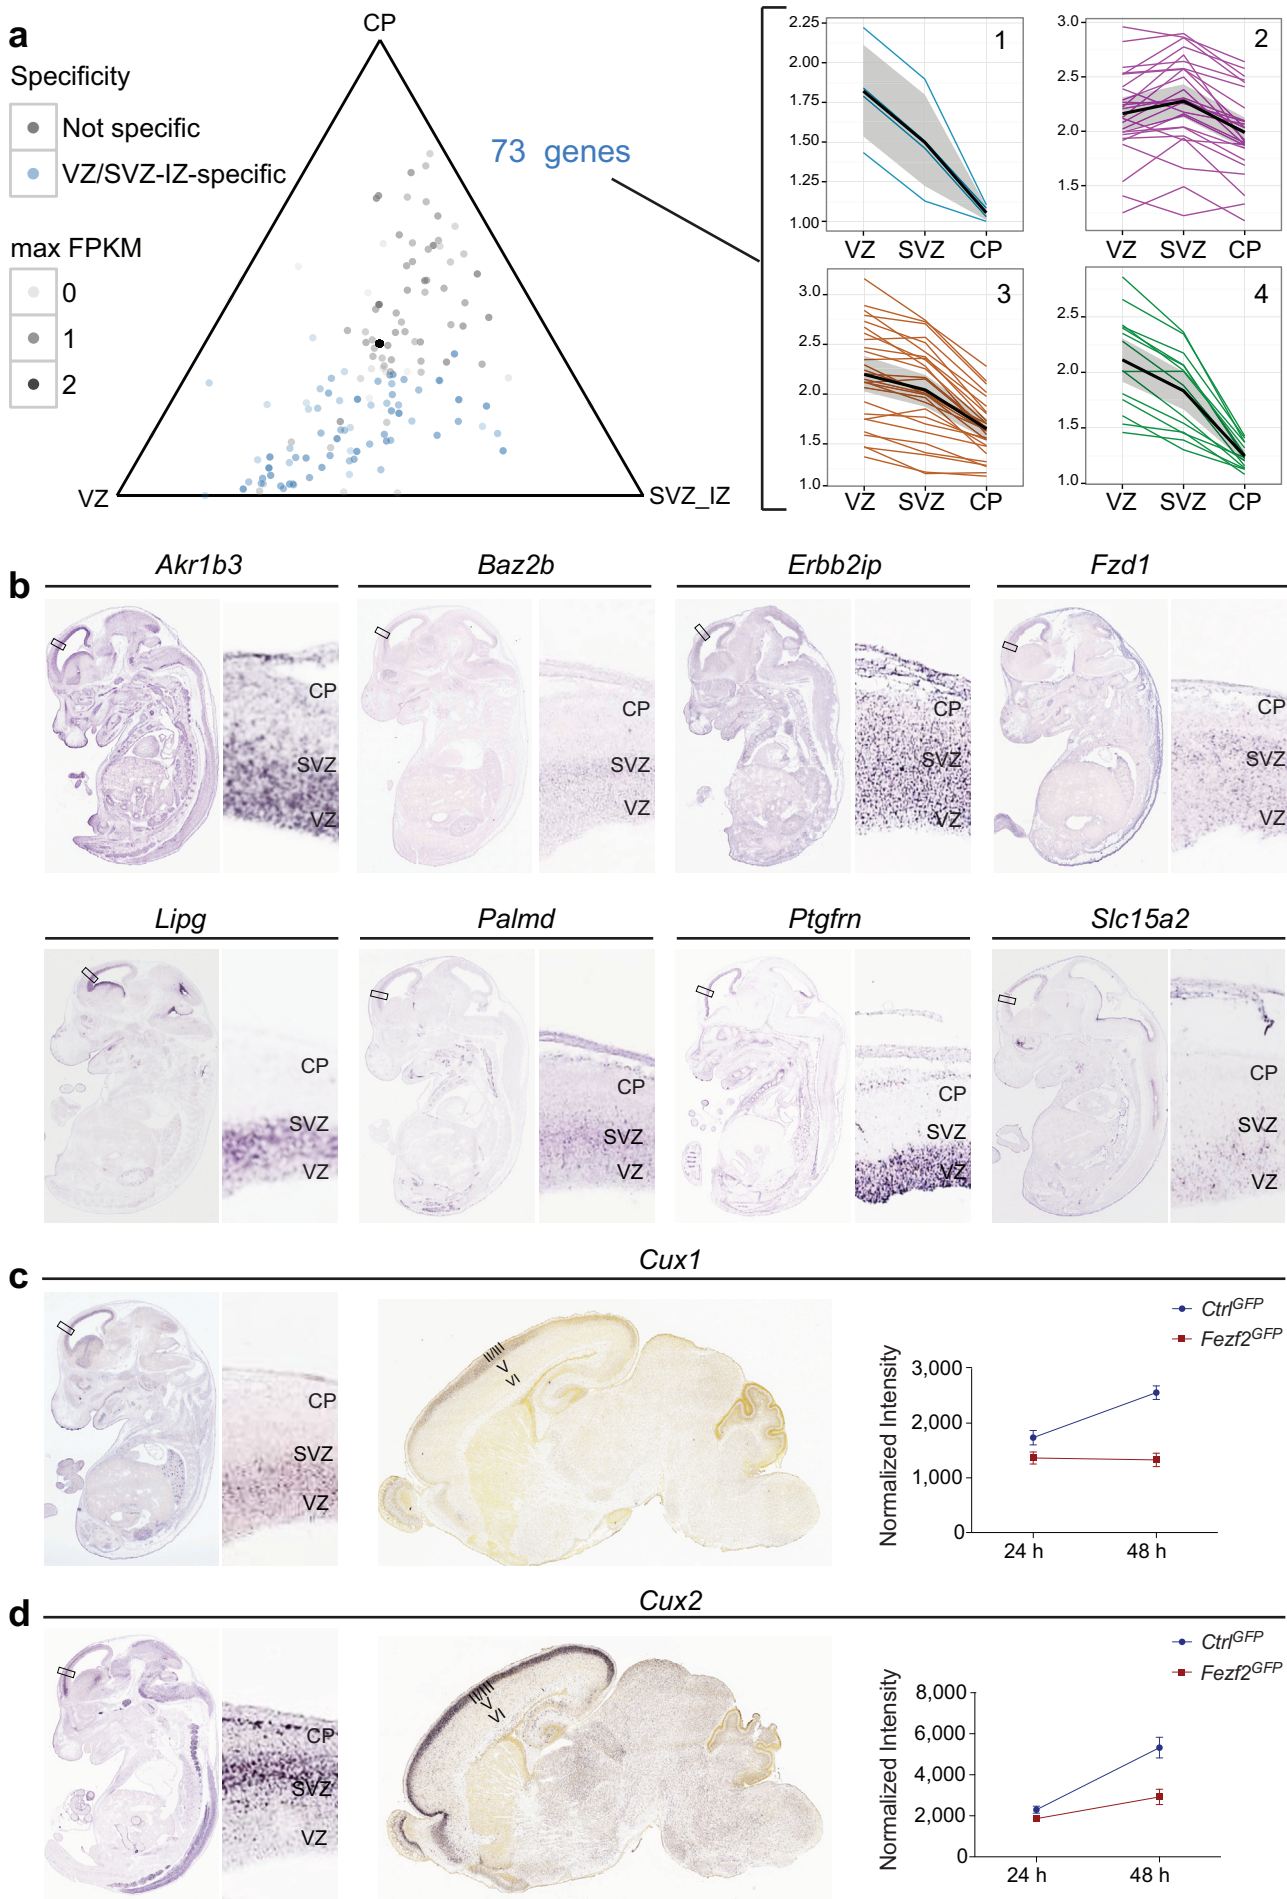

**Supplementary Figure 5. *Fezf2*-repressed genes are expressed in E14.5 VZ and SVZ/IZ cortical progenitors and in their progeny.**

**(a)** Left, ternary plot of expression profiles collapsed to probability distributions in VZ, SVZ/IZ and CP for *Fezf2*-repressed genes shows enrichment in the VZ and the SVZ/IZ. Right, cluster representation of 73 genes repressed by *Fezf2* and also significantly enriched in the E14.5 VZ-SVZ/IZ. Y axis, FPKM (Fragments Per Kilobase RNA per Million mapped reads). Complete gene list is available in **Supplementary Table 2**. **(b)** *In situ* hybridizations ([www.genepaint.org](http://www.genepaint.org)) for prototypical genes repressed by *Fezf2* and preferentially expressed in the E14.5 VZ-SVZ/IZ (insets, enlarged from boxed areas). **(c,d)** *In situ* hybridizations for *Cux1* and *Cux2* at E14.5 (left panels) showing specific expression in cortical progenitors. Middle panel, *in situ* hybridizations for *Cux1* and *Cux2* P4 showing specific expression in mature upper layer CPN ([www.developingmouse.brain-map.org](http://www.developingmouse.brain-map.org)). Far right, expression levels of *Cux1* and *Cux2* in *Ctrl*<sup>GFP</sup> (blue line) and *Fezf2*<sup>GFP</sup> samples (red line) are shown at 24 hours and 48 hours. Error bars indicate standard errors of the mean (SEM). CP, cortical plate; SVZ, subventricular zone; VZ, ventricular zone; IZ, intermediate zone. Images shown in **b**; **c** and **d** left 2 panels are from the Genepaint database and **c** and **d** middle panels are from the Allen Brain Atlas database.

(Related to Figure 2).

## Lodato, Arlotta; Supplementary Figure 6

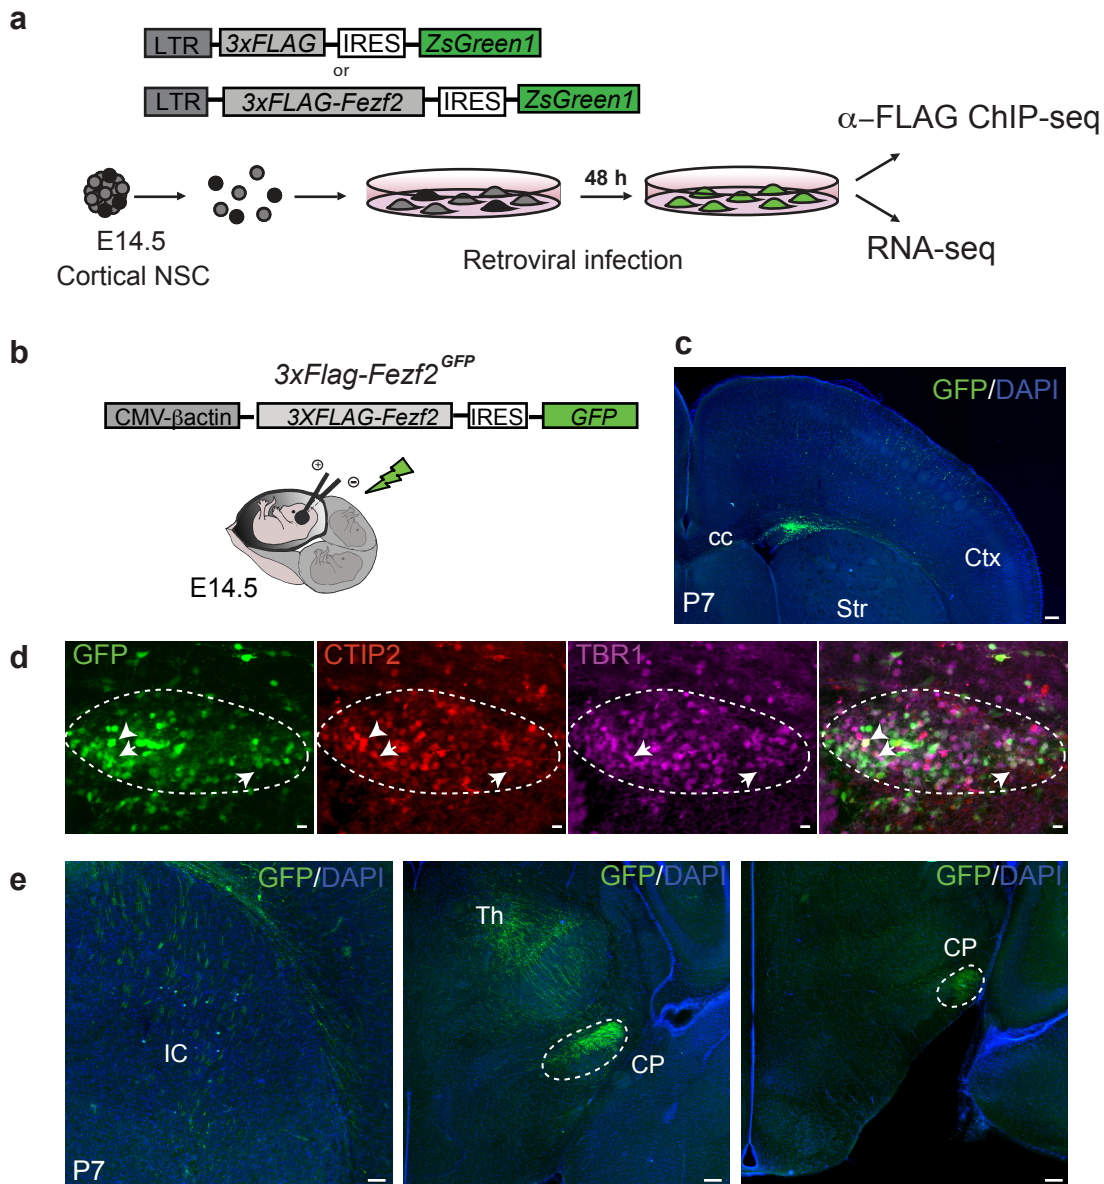

### Supplementary Figure 6. 3xFLAG-*Fezf2* recapitulates *Fezf2* overexpression phenotype *in vivo*.

N-terminally FLAG-tagged *Fezf2*, employed for ChIP-seq and RNA-seq experiments, retains the ability to instruct the molecular identity and connectivity of deep layer projection neurons when ectopically expressed in progenitors of the upper layers at E14.5

**(a)** Experimental design of the ChIP-seq and RNA-seq approach. **(b)** Schematic of the experimental approach. **(c)** 3xFLAG-*Fezf2* overexpression results in ectopic GFP<sup>+</sup> cell aggregates below the corpus callosum, phenocopying untagged *Fezf2* overexpression. **(d)** Immunohistochemistry for GFP, CTIP2 and TBR1 in electroporated brains harvested at P7 shows that 3xFLAG-*Fezf2* is sufficient to induce a switch of fate to CTIP2<sup>+</sup> and TBR1<sup>+</sup> corticofugal projection neurons. **(e)** Immunohistochemistry for GFP shows axonal projections through the internal capsule (IC) (left panel), toward the thalamus (Th) (middle panel) and through the cerebral peduncle (CP) (right panel) upon 3xFLAG-*Fezf2* overexpression. Ctx, cortex; Str, striatum; cc, corpus callosum. Scale bars, 100  $\mu$ m (b, d), and 20  $\mu$ m (c). (Related to Figure 3).

## Lodato, Arlotta; Supplementary Figure 7

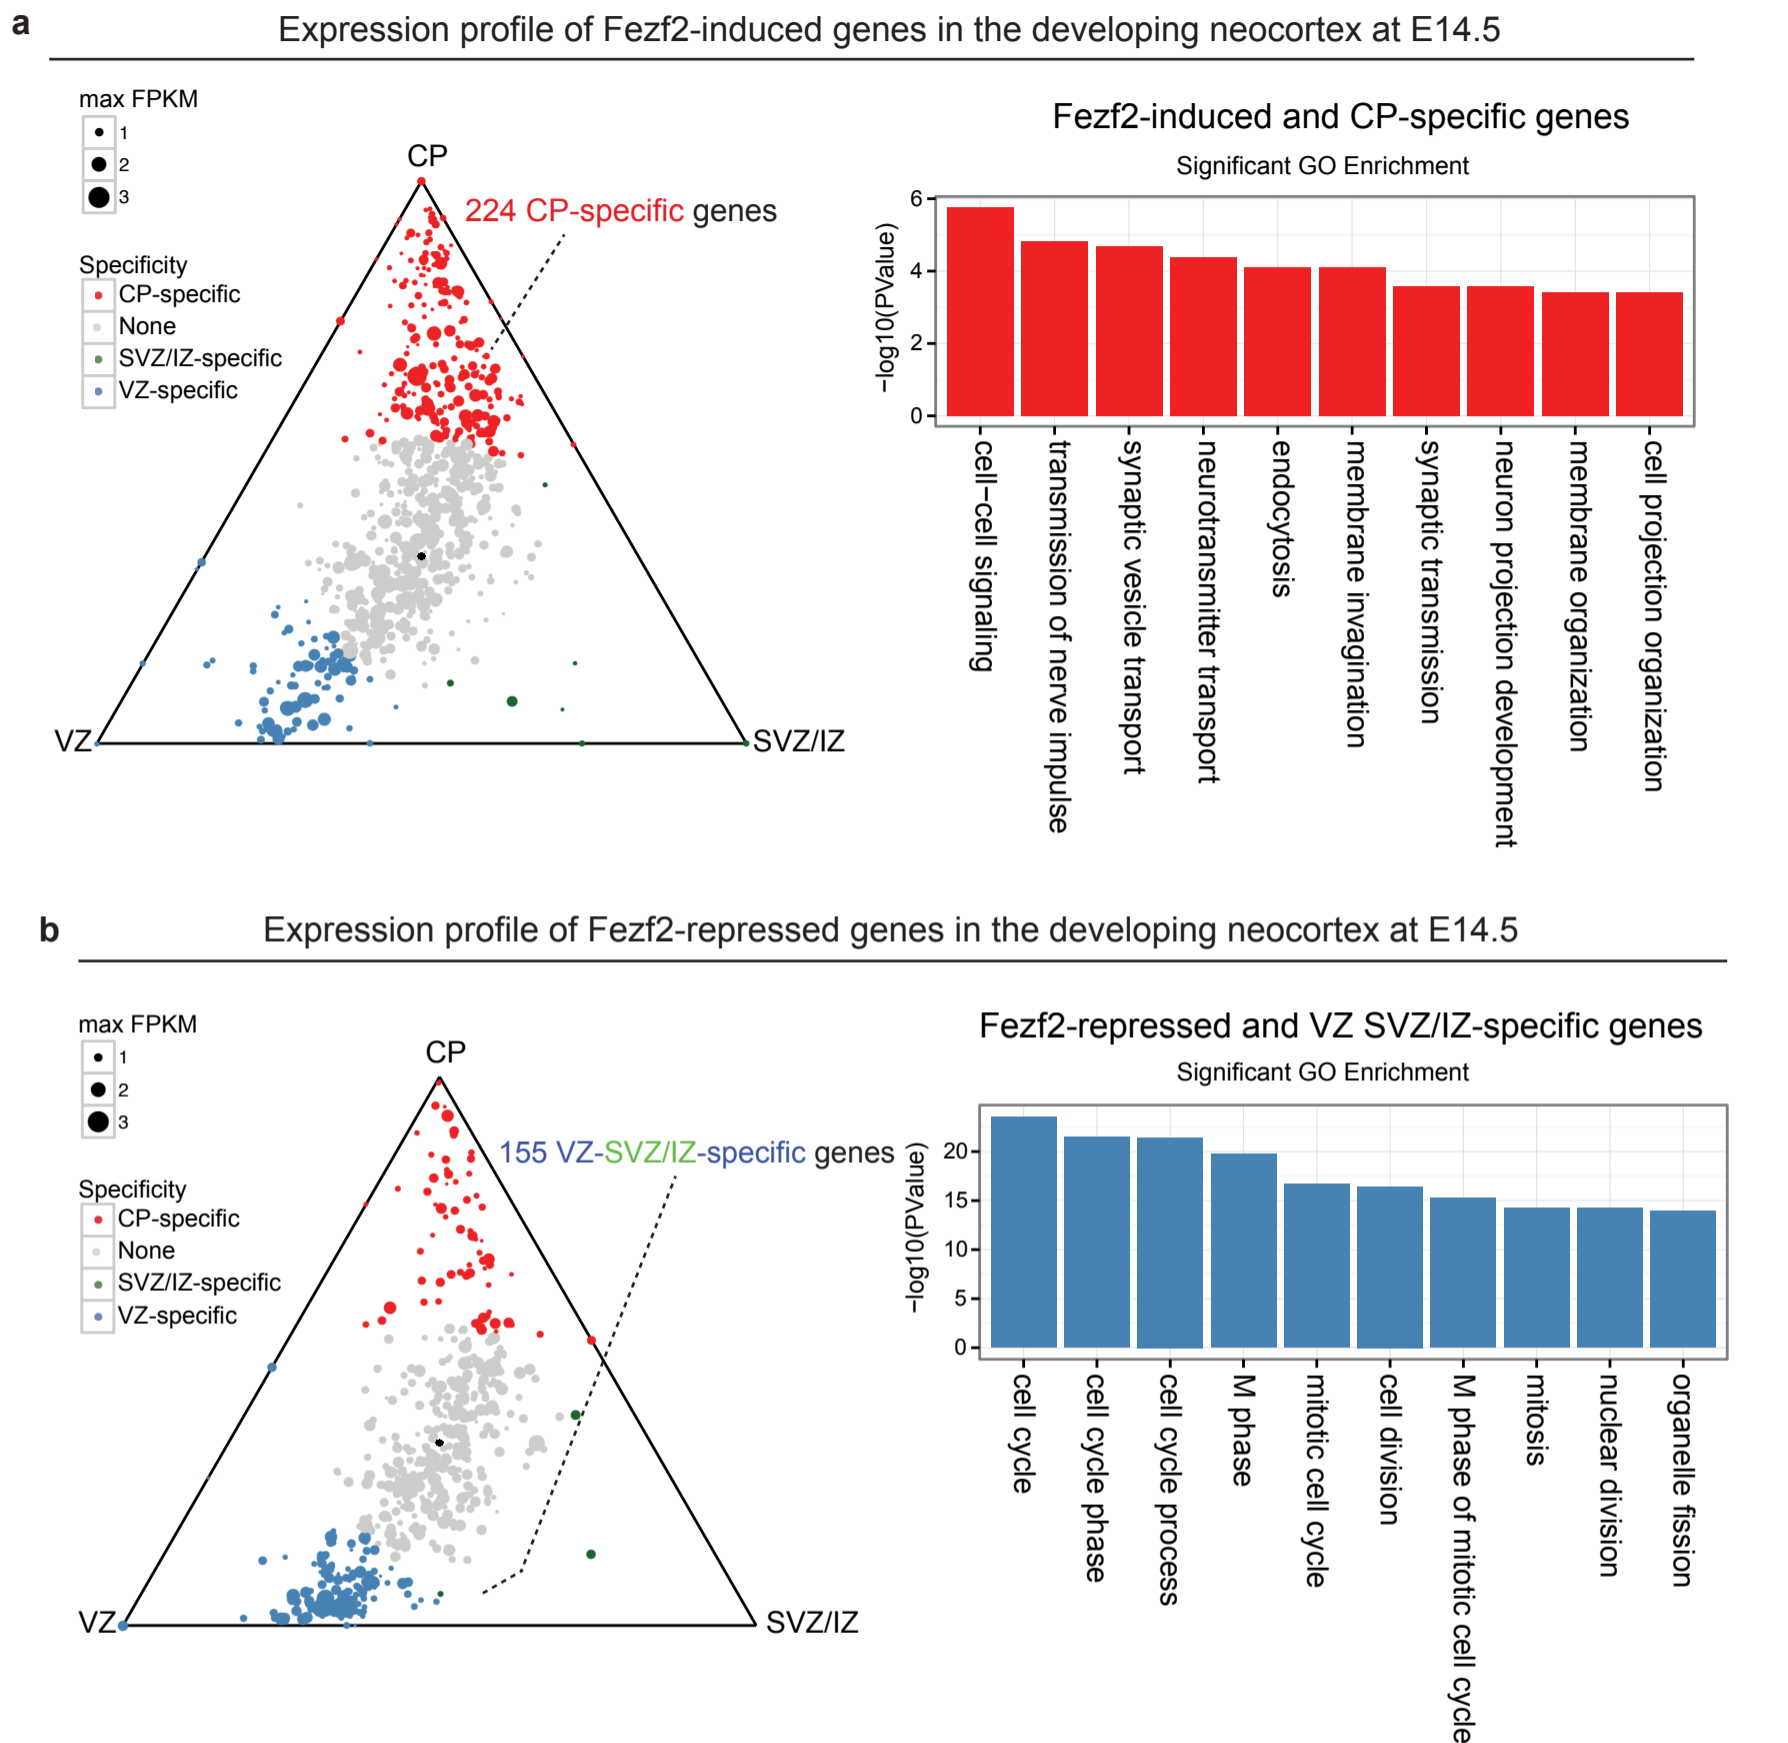

**Supplementary Figure 7. Overexpression of *Fezf2* in neurosphere-derived neurons *in vitro* directs transcriptional changes toward the nascent CSMN state.**

**(a)** Left, ternary plot of expression profiles collapsed to probability distributions in VZ, SVZ/IZ and CP for *Fezf2*-induced genes (identified from RNA-seq analysis) shows enrichment in the CP. Genes are classified as CP-specific (red), VZ-specific (blue), SVZ-specific (green), or non-specific (grey) using a specificity score threshold of 0.65 (detailed in Methods). Right, top 10 Gene Ontology categories from GO analysis of 224 genes up-regulated by *Fezf2* *in vitro*. **(b)** Left, ternary plot of expression profiles collapsed to probability distributions in VZ, SVZ/IZ and CP for *Fezf2*-repressed genes (identified from RNA-seq analysis) shows enrichment in the VZ- SVZ/IZ. Right, top 10 Gene Ontology categories from GO analysis of 155 genes down-regulated by *Fezf2* *in vitro* and specifically expressed in E14.5 VZ or SVZ/IZ. CP, cortical plate; VZ, ventricular zone; SVZ, subventricular zone; IZ, intermediate zone. (Related to Figure 3).

Lodato, Arlotta; Supplementary Figure 8

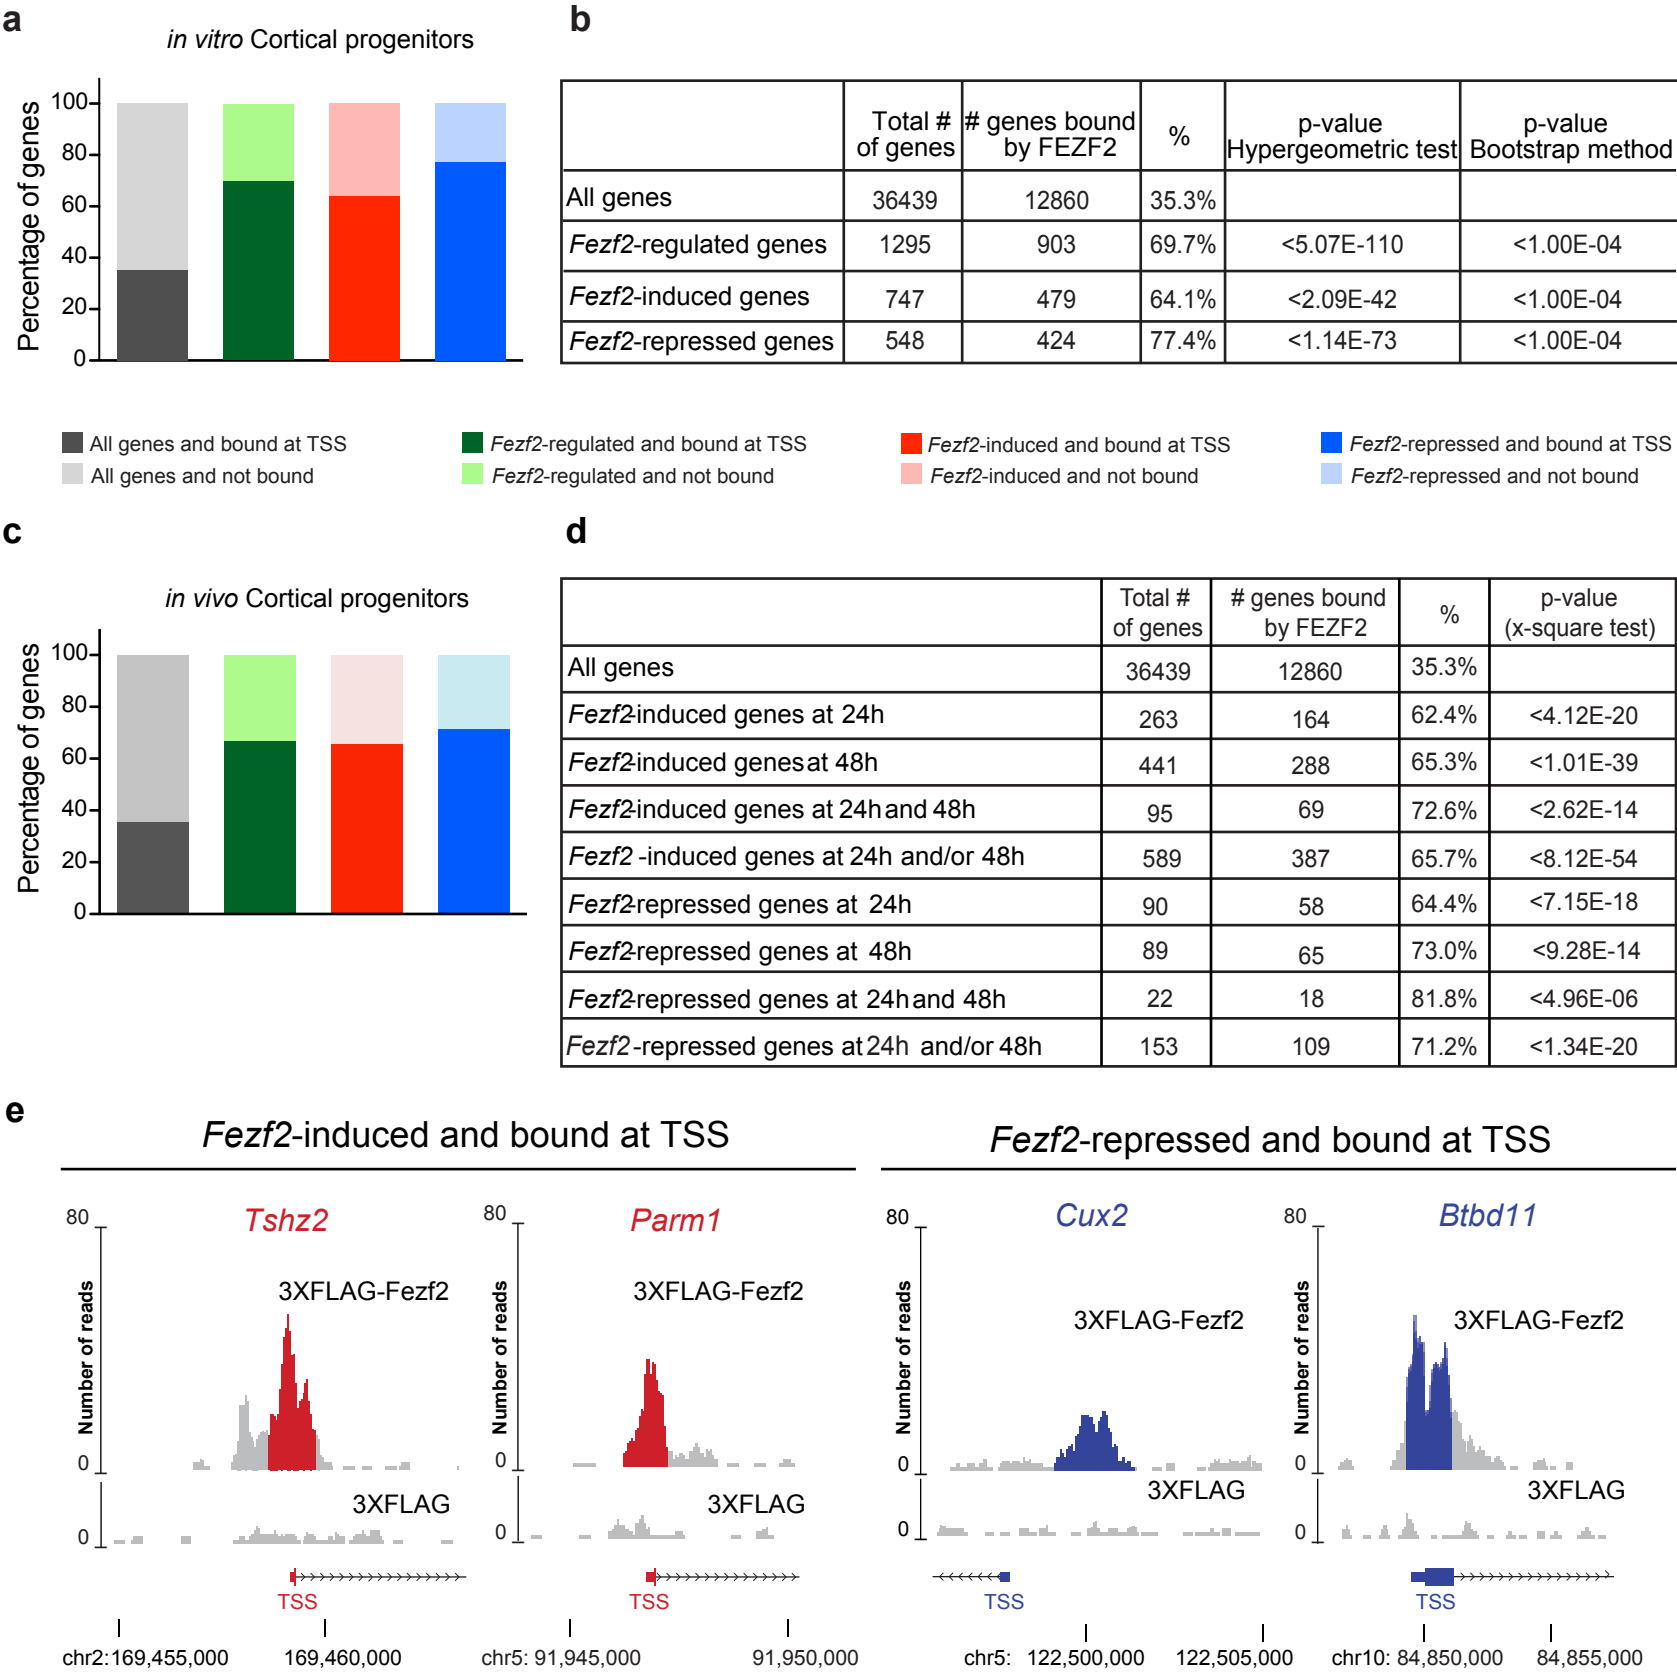

**Supplementary Figure 8. FEZF2 directly controls expression of its transcriptional targets *via* association with their promoter regions**

**(a)** Bar plots showing the percentage of FEZF2-bound genes among all genes (grey), *Fezf2*-regulated genes (green), *Fezf2*-induced genes (red), and *Fezf2*-repressed genes (blue) in *in vitro* cortical progenitors. **(b)** Table of gene counts, percentages of total, and p-values (hypergeometric test and bootstrap method) showing significant enrichment for FEZF2-bound genes in both the *Fezf2*-induced and *Fezf2*-repressed significant gene sets from *in vitro* cortical progenitors. **(c)** Bar plots showing the percentage of FEZF2-bound genes among all genes (grey), *Fezf2*-regulated genes (green), *Fezf2*-induced genes (red), and *Fezf2*-repressed genes (blue) in *in vivo* purified cortical progenitors. **(d)** Table of gene counts, percentages of total, and p-values ( $\chi^2$ -test) demonstrating significant enrichment for FEZF2-bound genes in both the *Fezf2*-induced and *Fezf2*-repressed significant gene sets from *in vivo* purified E14.5 cortical progenitors collected at 24h and 48h after *Fezf2* over-expression. **(e)** Examples of 3xFLAG-*Fezf2* peaks at the proximal promoters of CSMN-specific, *Fezf2*-induced genes (red peaks) and CPN-specific, *Fezf2*-repressed genes (blue peaks). Source data is shown in **Supplementary Table 6**. (Related to Figure 3).

# Lodato, Arlotta; Supplementary Figure 9

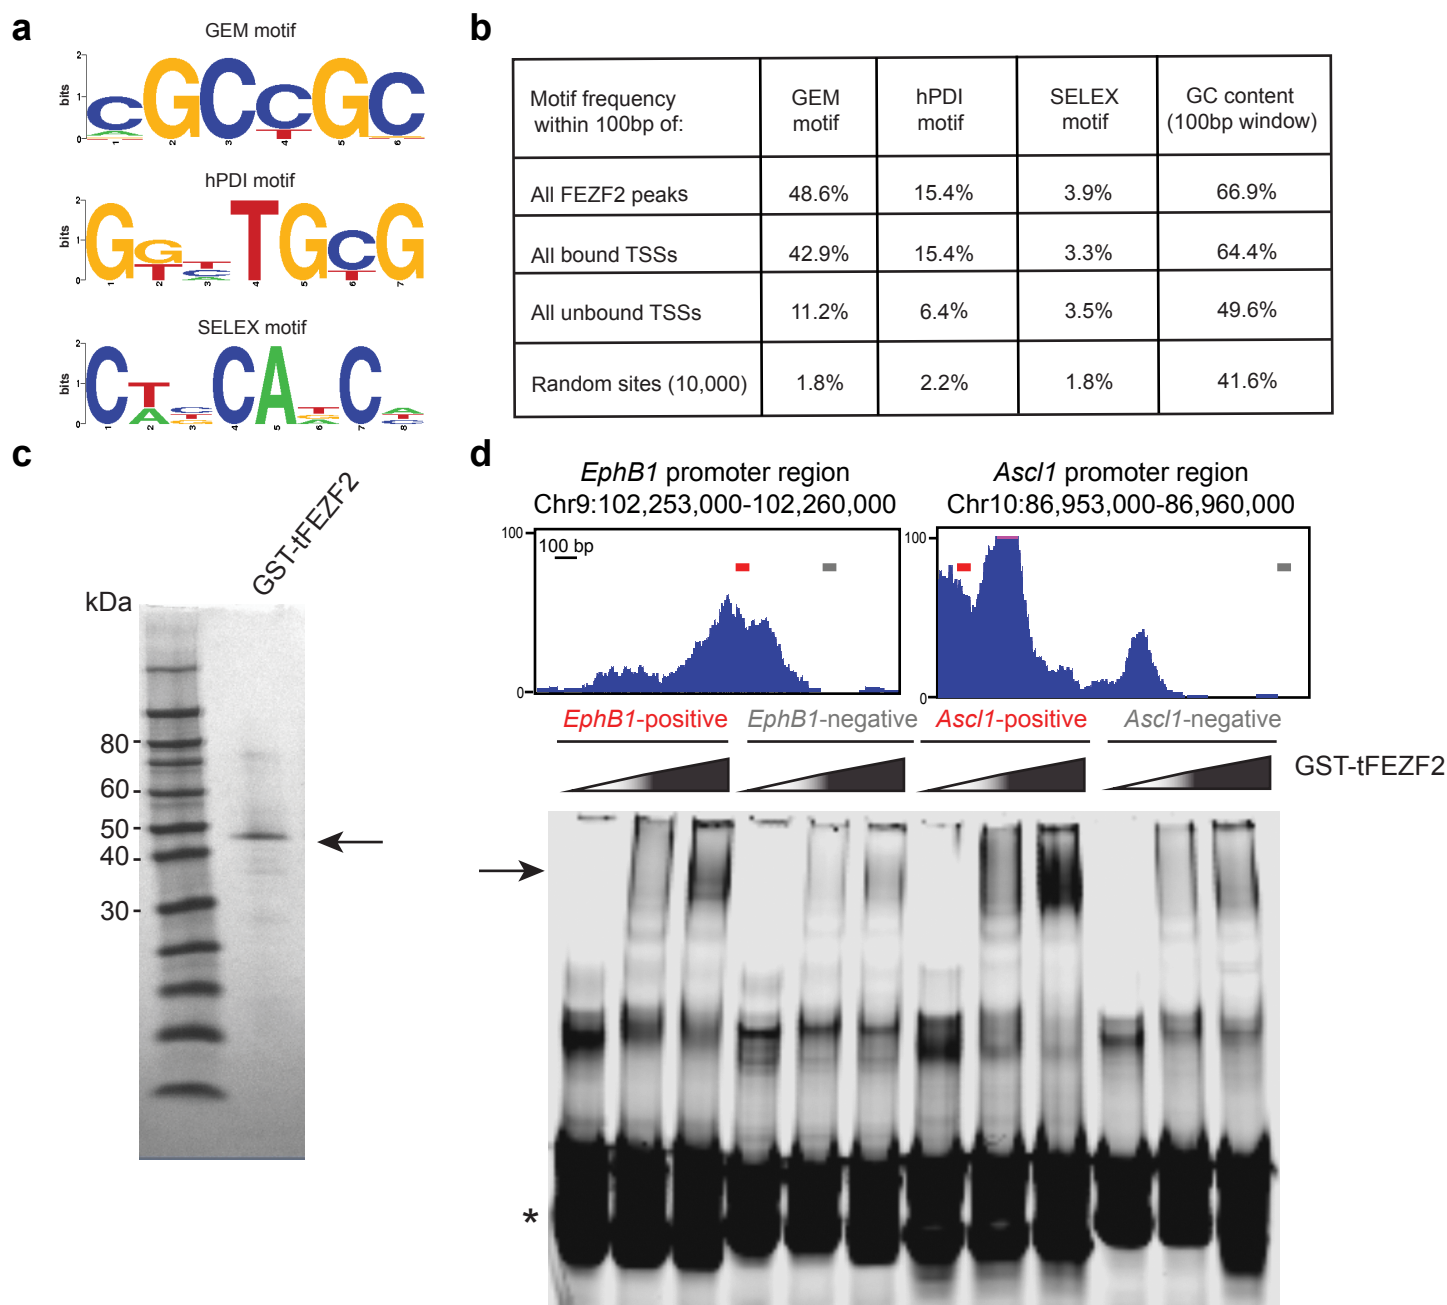

## Supplementary Figure 9. FEZF2 directly associates with a CG-rich consensus sequence.

(a) The CG-rich FEZF2 consensus motif identified by GEM differs from two previously predicted FEZF2 motifs (SELEX and hPDI). (b) The motif-independent approach GPS found the GEM-defined motif more represented at the FEZF2-bound sites compared to the two previously defined motifs. FEZF2-bound Transcriptional Start Sites (TSSs) were also found preferentially associated with the GEM-defined motif compared to unbound TSSs. (c) Coomassie blue staining of purified GST-tFEZF2 protein (see Methods). The expected molecular weight of the GST-fusion truncated protein is 43.5 kDa, (arrow). (d) Electrophoretic mobility shift assay of probes for regions within the promoters of *Ascl1* and *EphB1* in the presence of GST-tFEZF2. Probes containing FEZF2 consensus motifs (*EphB1*-positive and *Ascl1*-positive) showed specific interaction with GST-tFEZF2 compared to probes without the consensus motifs in neighboring region of the same promoters (*EphB1*-negative and *Ascl1*-negative). Arrow, probes bound to GST-tFEZF2; Asterisk, unbound probes. (Related to Figure 3).

# Lodato, Arlotta; Supplementary Figure 10

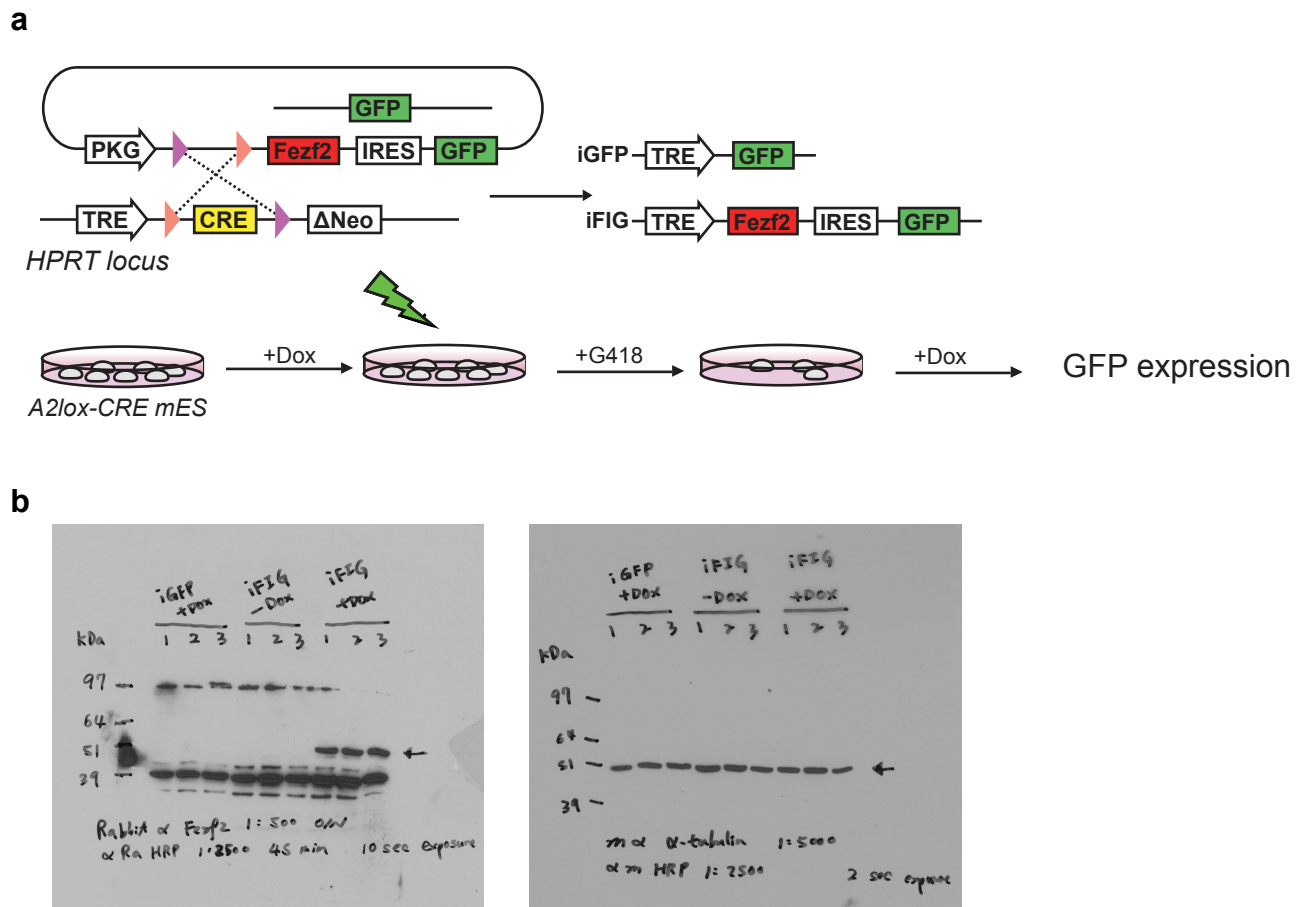

**Supplementary Figure 10. Generation of inducible Fezf2 mouse ES cell lines.**

**(a)** Strategy used for derivation of TET-ON Fezf2 mouse ES cell lines using the inducible cassette exchange method (see Methods). **(b)** Uncropped original immunoblots of Figure 4c.

Lodato, Arlotta; Supplementary Figure 11

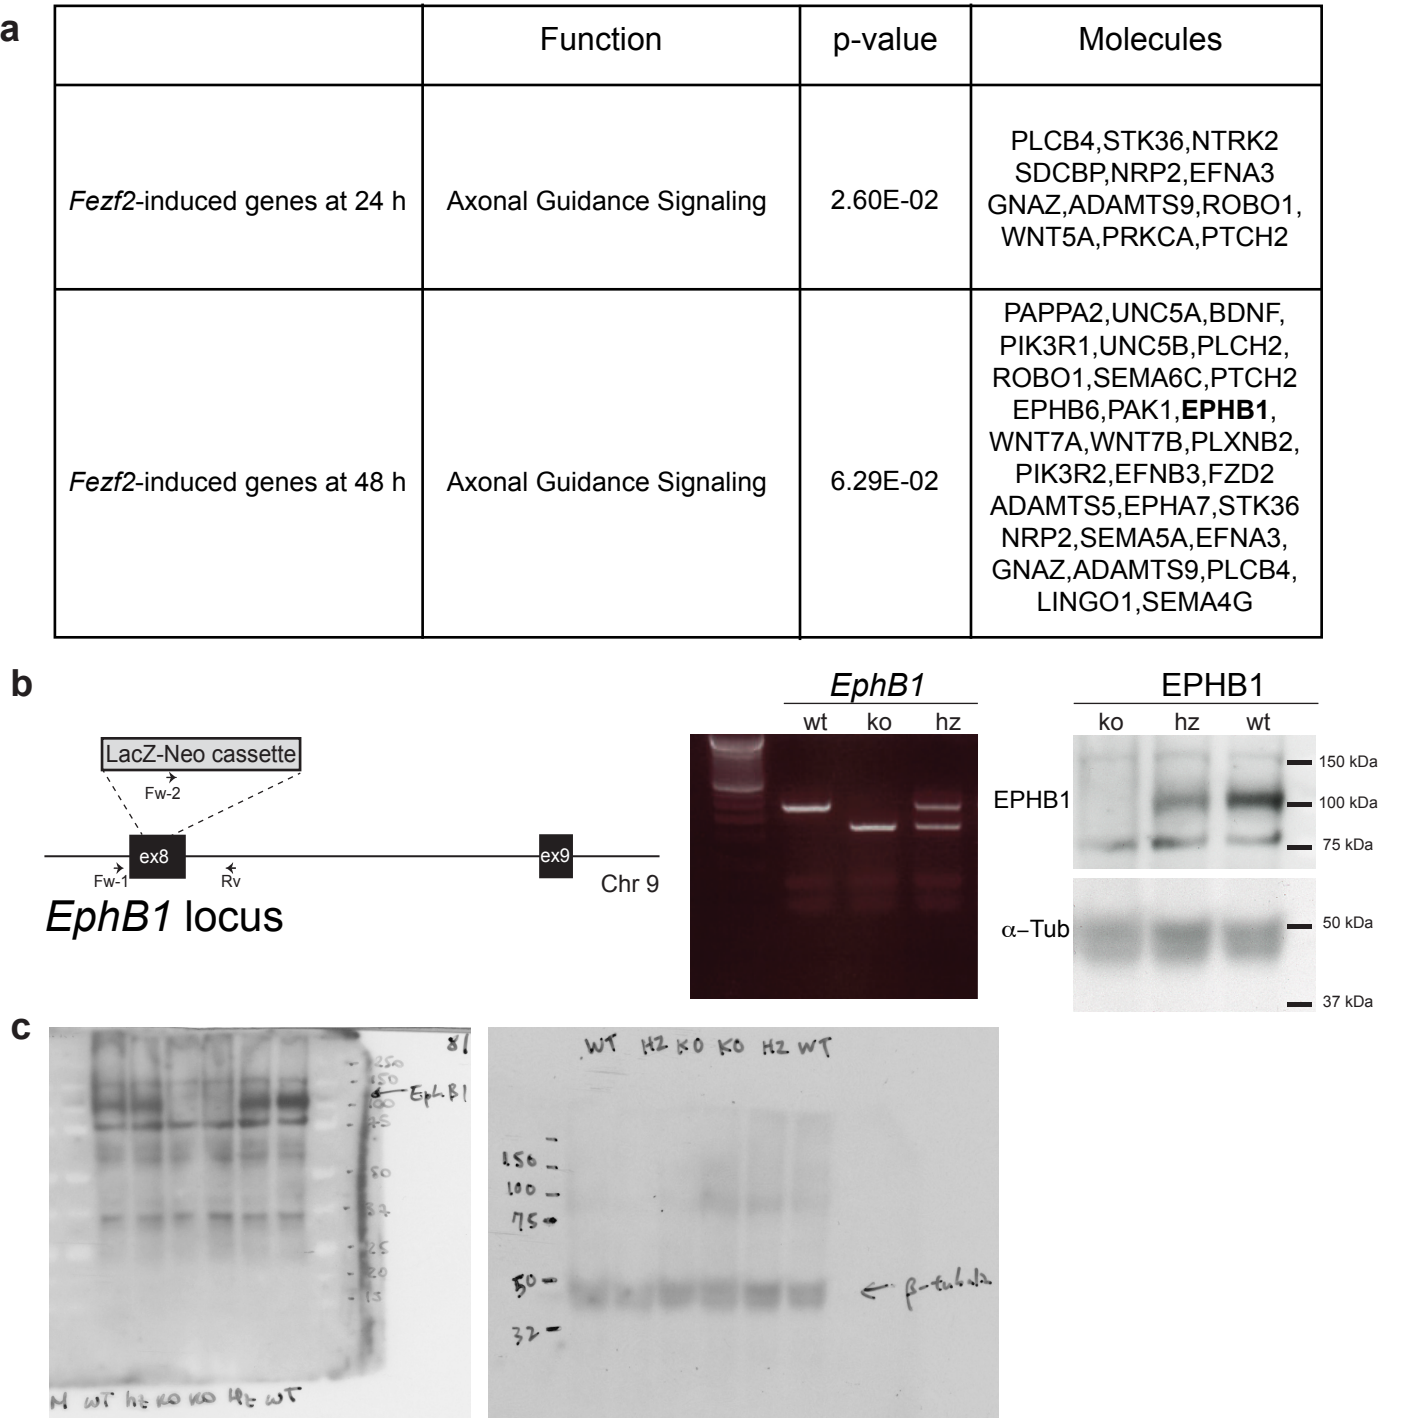

**Supplementary Figure 11. Axon guidance signaling molecules are highly represented in the GO analysis of *Fezf2*-induced genes and include the tyrosine kinase receptor *EphB1*.**

**(a)** GO analysis using *Fezf2*-induced genes at 24 hours and 48 hours identifies “axon guidance signaling” among the most significant categories (ranking as the most significant category at 48 hours). **(b, far left panel)** Schematic representation of the *EphB1* gene targeting strategy (Deltagen Inc.). Arrows show positions and orientations of the primers employed for genotyping PCR. **(b, middle panel)** Genotyping PCR using primers flanking the targeted region identifies a 350 bp product corresponding to the wild type allele and a 300 bp product corresponding to the *EphB1*<sup>-/-</sup> allele. **(b, most right panel)** Western blot of brain lysate from P1 wild type, *EphB1*<sup>+/-</sup> pups, and *EphB1*<sup>-/-</sup> P1 pups using anti-EPHB1 antibody shows absence of EPHB1 protein (expected MW=100 kDa) in the *EphB1*<sup>-/-</sup> sample and a reduction in the *EphB1*<sup>+/-</sup> sample compared to wild type. Anti- $\beta$ -tubulin is used as loading control. **(c)** Uncropped original immunoblots shown in panel **(b, most right panel)**.  
(Related to Figure 5).

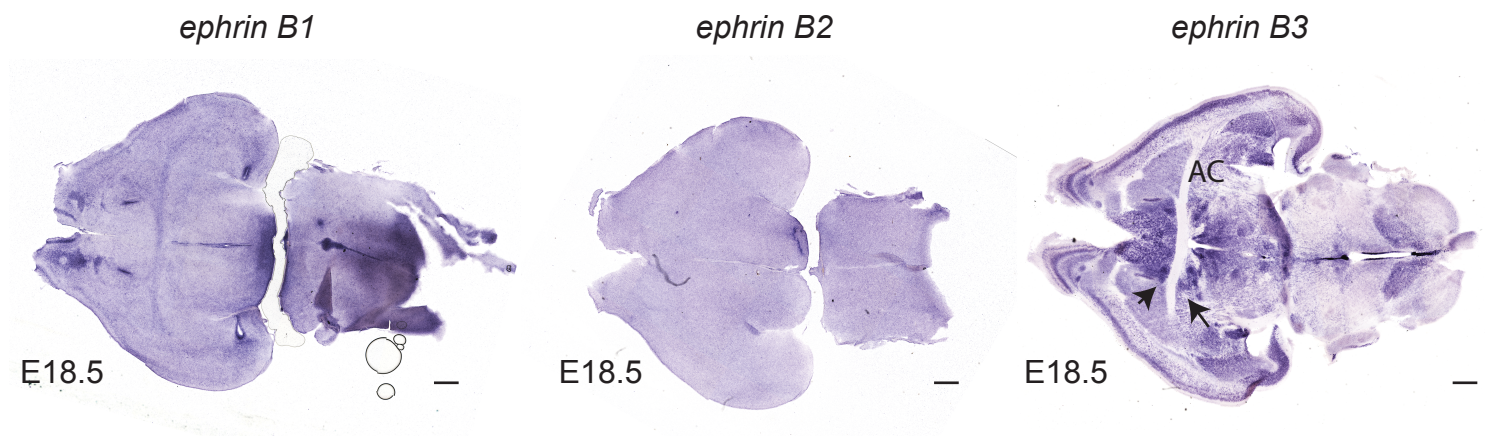

**Supplementary Figure 12. Expression patterns of *EphB* ligands in the mouse brain.**

*In situ* hybridization for *ephrin B1*, *ephrin B2* and *ephrin B3* on horizontal wild type brain sections at E18.5 shows expression of *ephrin B3* at the ventral forebrain midline. AC, anterior commissure. Scale bars, 100  $\mu$ m. (Related to Figure 7).

# Lodato, Arlotta; Supplementary Figure 13

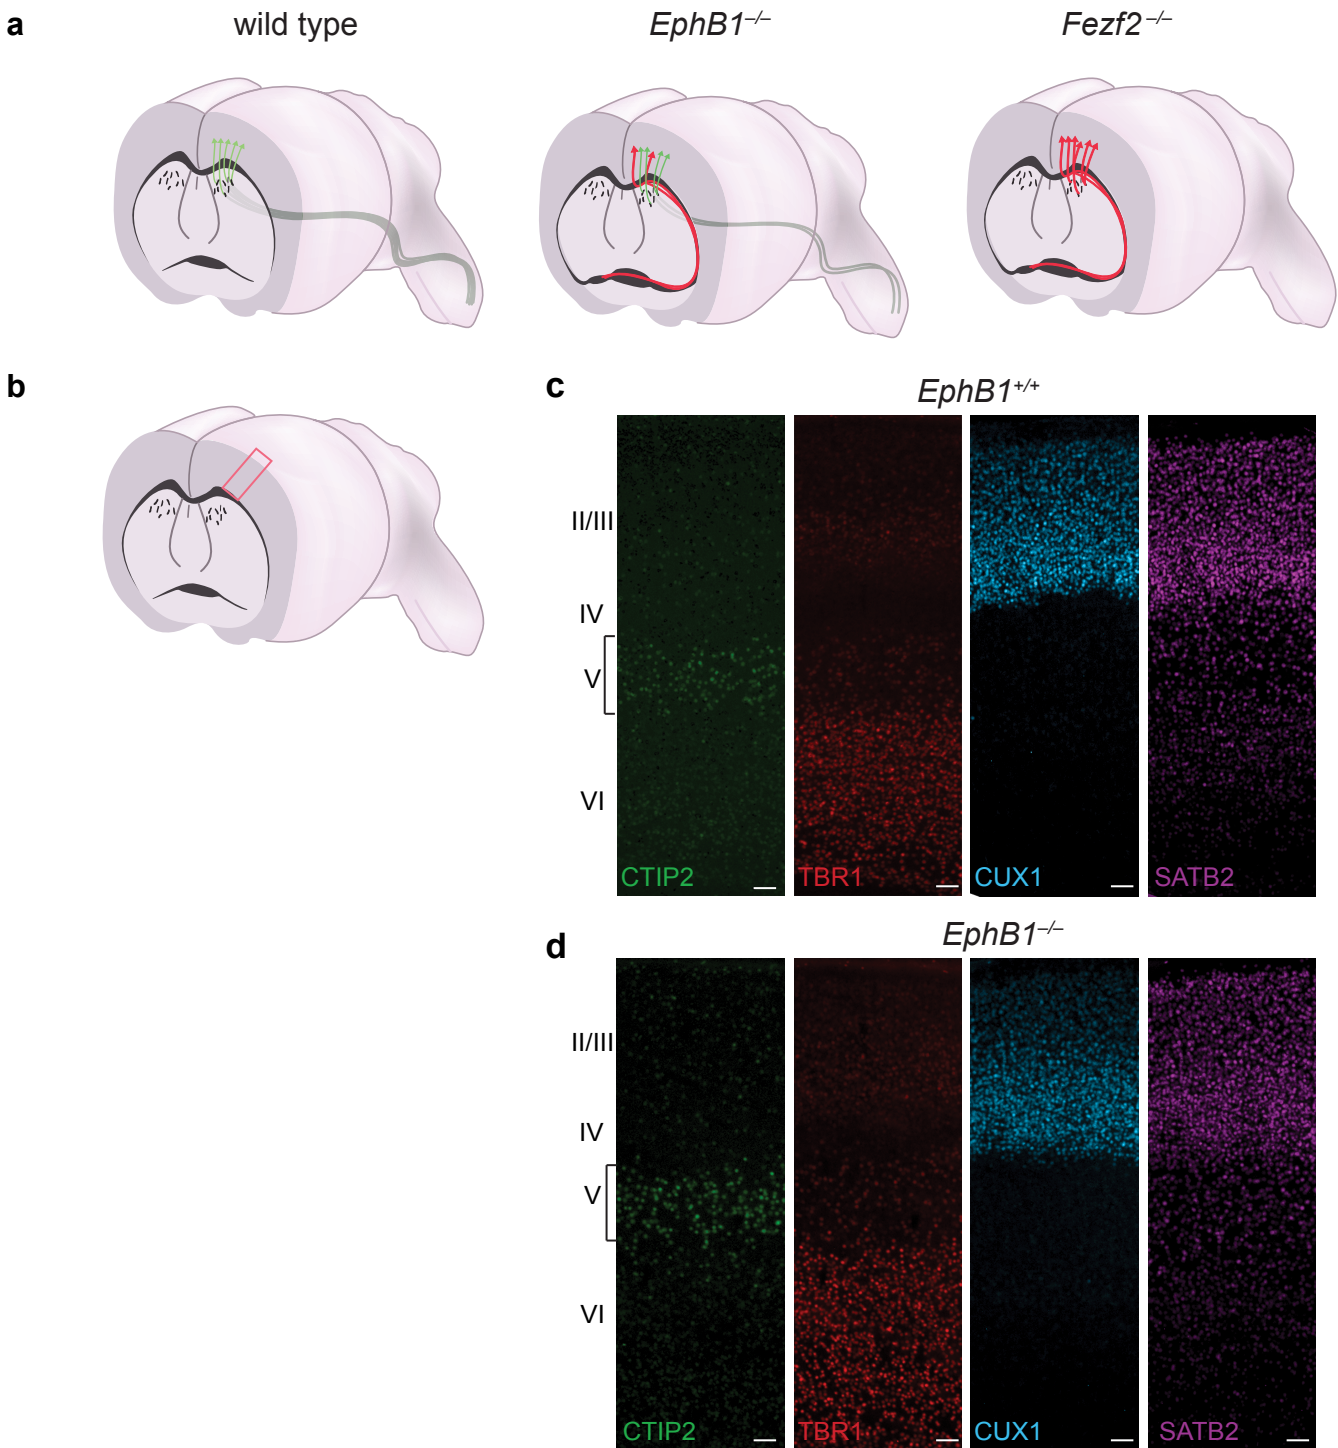

**Supplementary Figure 13. Class-specific identity and distribution of cortical projection neurons is unaltered in *EphB1*<sup>-/-</sup> mice.**

**(a)** Schematic representation of the axon pathfinding phenotypes observed in both *EphB1*<sup>-/-</sup> and *Fezf2*<sup>-/-</sup> mice. **(b)** Schematic drawing of a P7 brain showing the position of area imaged. **(c-d)** Immunocytochemistry for CTIP2, TBR1, CUX1 and SATB2 show no difference in the layer distribution of these markers in *EphB1*<sup>-/-</sup> **(d)** compared to wild type mice **(c)**. Scale bars, 100  $\mu$ m. (Related to Figure 7).
